# Supplementary material
Source: PubMed Central journal article supplement (PMC2242725)
Supplement: pnas_0709466105_1.pdf [file pnas_0709466105_1.pdf]

PaIso 1 MALLSSSLSSQIPTGSHPLTH --- TQCIPHRFSTTINAGHSAGKPRSFYLRWGKGSNKIIACVGGTTSLLHYQSAEKTDSLSAPTLVKREFFPPGFWK  
 PaLAS 1 MALLSSSLSSQIPTGABHLNLNAYANTQCIPHRFSTLNAGTSAGKRSLYLRWGKGSNKIIACVGG --- DLSLAPTLVKREFFPPGFWK  
 PtLAS 1 MALLSSSLSSQIPG --- ATQCIPHRFHSLNAGTSAGKRSLYLRWGKSPKIVACAG --- DPFVPTLVKREFFPPGFWK  
 AgAS 1 MAMSSSLSSQIPTAAHHLIAN --- AQSIPHRFSTTINAGSSASKRRLSLYLRWGKGSNKIIACVGGGATSVVHYQSAEKNDSLSSTLVKREFFPPGFWK  
 GbLS 1 MAGVLEIANLPCSLQLSPKVPFR --- QSTNIIIPFRKRSSFGNAQHCVRSHLRLRWNCVGIHSAABTRPDQLE --- QERFVSRNLADYHPAVWK

PaIso 94 DHVIDSLTSSHKVSAABE --- KRMETLISEIKNFRSMGVGETNPSAYDTAWVARIPAVDGSBHPFPETLEWILONQLKDGSGWGEFFYFLAYDRI  
 PaLAS 86 DHVIDSLTSSHKVSAABE --- KRMETLISEIKNFRSMGVGETNPSAYDTAWVARIPAVDGSBHPFPETLEWILONQLKDGSGWGEFFYFLAYDRI  
 PtLAS 77 DHVIDSLMPYSHKVAABE --- KRMETLISEIKNFRSMGVGETNPSAYDTAWVARIPAVDGSBHPFPETLEWILONQLKDGSGWGEFFYFLAYDRI  
 AgAS 96 DDVIDSLTSSHKVSAABE --- KRMETLISEIKNFRSMGVGETNPSAYDTAWVARIPAVDGSBHPFPETVTEWILONQLKDGSGWGEFFYFLAYDRI  
 GbLS 91 DDVIDSLTSPNSHATSKS SVDETINMKRIQTLVKEIQCMFQSMGGETNPSAYDTAWVARIPSIDGSGAPCFPQTLOWILNQLIDGSGWGEBCIFLAYDRV

PaIso 187 LATLACIITLTLWRTGETQIRKGIIEFFKTQAGKIEDEADSHRPSGFEIVFPAMLKEAKVLGLDLPYELPFIKQIIEKREAKLRLPTNIIYALPTLLYS  
 PaLAS 179 LATLACIITLTLWRTGETQVQKGIIEFFKTQAGKIEDEADSHRPSGFEIVFPAMLKEAKVLGLDLPYELPFIKQIIEKREAKLRLPTNIIYALPTLLYS  
 PtLAS 170 LATLACIITLTIWQGDVQVQKGIIEFFKTQAGKIEEADSHRPSGFEIVFPAMLKEAKVLGLDLPYELPFIKQIIEKREAKLRLPDDLYALPTLLYS  
 AgAS 189 LATLACIITLTLWRTGETQVQKGIIEFFKTQAGKMEDEADSHRPSGFEIVFPAMLKEAKVLGLDLPYDLPFIKQIIEKREAKLRLIPTDLYALPTLLYS  
 GbLS 191 LATLACLLTLKWNKGDVQVQKGVFVRKHEEMKDEADNHRPSGFEIVFPAMLEAKVSLGLDLPYHLPFISQIHOKRQKLIKIPIDLNHNHOTALLY

PaIso 287 LEGLQIVVDWEKIIKLQSKDGSFLSPASTAAVFMRTGNKKCLEFLNVLVKKFNHVPCHYPLDLFERLWAVDTVERLGDIDHFKEEKDALDYVYSHWD  
 PaLAS 279 LEGLQIVVDWQIINKLQSKDGSFLSPASTAAVFMRTGNKKCLEFLNVLVKKFNHVPCHYPLDLFERLWAVDTIERLGDIDHFKEEKDALDYVYSHWD  
 PtLAS 270 LEGLQIVVDWEKIMKLQSKDGSFLSPASTAAVFMRTGNKKCLEFLNVLVKKFNHVPCHYPLDLFERLWAVDTVERLGDIDHFKEEKDALDYVYSHWD  
 AgAS 289 LEGLQIVVDWQIINKLQSKDGSFLSPASTAAVFMRTGNKKCLEFLNVLVKKFNHVPCHYPLDLFERLWAVDTVERLGDIDHFKEEKDALDYVYSHWD  
 GbLS 291 LEGLQIVVDWQIINKLQSRDGSFLSPASTACVFMHTGNKKCLEFLNVLVSKFGDYVPCHYPLDLFERLWAVDTVERLGDIDRYFKKEIKESLDYVYVYWD

PaIso 387 ERGIGWARENPVPIDDDTAMGLRILRLHGYNVSSDVLKTRFDENGEFFCFLGQTRGVTDMLNVNRCSHVAFPGETIMEEAKLCTERYLRNALEDVGF  
 PaLAS 379 ERGIGWARENPVPIDDDTAMGLRILRLHGYNVSSDVLKTRFDENGEFFCFLGQTRGVTDMLNVNRCSHVAFPGETIMEEAKLCTERYLRNALEDVGF  
 PtLAS 370 ERGIGWARENPVPIDDDTAMGLRILRLHGYNVSSDVLKTRFDENGEFFCFLGQTRGVTDMLNVNRCSHVAFPGETIMEEAKLCTERYLRNALEDVGF  
 AgAS 389 ERGIGWARENPVPIDDDTAMGLRILRLHGYNVSSDVLKTRFDENGEFFCFLGQTRGVTDMLNVNRCSHVAFPGETIMEEAKLCTERYLRNALEDVGF  
 GbLS 391 ERGIGWARCNPIPDVDDTAMGLRILRLHGYNVSSDVLNFRDEKGDFFCFAGQTCRGVTDMLNLRCSQVCFPGEKIMEEAKLPTNHLQNALAKNNAF

PaIso 486 DKWALKKNIRGEVEYALIKYPHRSMPREARSYIEHYGNPDVWLKGTMYMPPYISNKYLELAKLDFNMQVSHQKELDRDLRWKSSGSLSEKLFTRERY  
 PaLAS 478 DKWALKKNIRGEVEYALIKYPHRSMPREARSYIEHYGNPDVWLKGTMYMPPYISNKYLELAKLDFNMQVSHQKELDRDLRWKSSGSLSEKLFTRERY  
 PtLAS 469 DKWALKKNIRGEVEYALIKYPHRSMPREARSYIENYGNPDVWLKGTMYMPPYISNKYLELAKLDFNMQVSHQKELDRDLRWKSSGSLSEKLFTRERY  
 AgAS 488 DKWAFKNIRGEVEYALIKYPHRSMPREARSYIENYGNPDVWLKGTMYMPPYISNKYLELAKLDFNMQVSHQKELQDLRWKSSGSLSEKLFTRERY  
 GbLS 491 DKWAFKNIDGVEVEYALIKYPHRSMPREARSYIEHYGNPDVWLKGTMYMPPYISNKYLELAKLDFNMQVSHQKELQHIVSWRRESGFDLNFTRQRE

PaIso 586 TEIYFSPASFIFPEPEFATCRVYTKTSNFTVILDDLYDAHGTLDNLELFSVGVKRWDLSSLVDMPQDMKICFVGFYNTFNIEIABGRKRQGRDVLGYIR  
 PaLAS 578 TEIYFSPASFIFPEPEFATCRVYTKTSNFTVILDDLYDAHGTLDLKLFTESVKKRWDLSSLVDMPQDMKICFVGFYNTFNIEIABGRKRQGRDVLGYIR  
 PtLAS 569 AEIYFSPASFIFPEPEFATCRVYTKTSNFTVILDDLYDAHGTLDNKLFTESVKKRWDLSSLVDMPQDMKICFVGFYNTFNIEIABGRKRQGRDVLGYIQ  
 AgAS 588 TEIYFSPASFIFPEPEFATCRVYTKTSNFTVILDDLYDAHGSLDCLKLFTESVKKRWDLSSLVDMPQDMKICFVGFYNTFNIEIABGRKRQGRDVLGYIQ  
 GbLS 591 VEMYFSPAVSMFPEPEFAACRYAYKTSGLAVILDDLYDHGSLDCLKLFSVAERVRWDLSSLVDMPQDMKICFVGFYNTFNIEIABGRKRQGRDVLGYIR

PaIso 685 NVVEIQLEAYTKAEWSAARVYVPSFDEYIENASVSIALGTVVLISALFTGTEILIDDVLSKIGRSRFLQMLGLTGRLVNDTKTYAERGQGEVASAQCY  
 PaLAS 677 NVVEIQLEAYTKAEWSAARVYVPSFDEYIENASVSIALGTVVLISALFTGTEILIDDVLSKIGRSRFLQMLGLTGRLVNDTKTYAERGQGEVASAQCY  
 PtLAS 668 KVVEIQLEAYTKAEWSAARVYVPSFDEYIENASVSIALGTVVLISALFTGTEILIDDVLSKIGRSRFLQMLGLTGRLVNDTKTYAERGQGEVASAQCY  
 AgAS 687 NVVEIQLEAYTKAEWSAARVYVPSFDEYIENASVSIALGTVVLISALFTGTEILIDDVLSKIGRSRFLQMLGLTGRLVNDTKTYAERGQGEVASAQCY  
 GbLS 691 KVVEIQLEAYTKAEWSAARVYVPSFDEYIENASVSIALGTVVLISALFTGTEILIDDVLSKIGRSRFLQMLGLTGRLVNDTKTYAERNRDELVSVQCY

PaIso 785 MKEHPEISEEEALQHVVYVMENALDELNREFVNNR-DVPDSCRRLVFETARIMQLFYMGDGLTSHHMEIKEHVKNCLFPQVA  
 PaLAS 777 MKDHPKISEEEALQHVVYVMENALDELNREFVNNR-EVPDSCRRLVFETARIMQLFYMGDGLTSHHMEIKEHVKNCLFPQVA  
 PtLAS 768 MKDHPKISEEEALQHVVYVMENALDELNREFVNNR-DVPDTCRRLVFETARIMQLFYMGDGLTSHHMEIKEHVKNCLFPQVA  
 AgAS 787 MKDHPKISEEEALQHVVYVMENALDELNREFVNNR-KIPDYKRLVFETARIMQLFYMGDGLTSHHMEIKEHVKNCLFPQVA  
 GbLS 791 MRENPECEEEALSHVYCHIDNALKELNWEANPASNAPLQVRRLLFNTRARVQLFMYRDFGECISDRKEMKDHVSRITLFDPA
